# Supplementary material
Source: ML conference proceedings conference paper supplement (https://openreview.net/forum?id=lDbjooxLkD)
Supplement: supplementary_material [file 0908result-3.xlsx]

## Sheet: emoji_pass_until
0.03b	0.1b	0.2b	0.5b	0.9b	1.5b
	0	0	2.55102e-05	0.000625	0.00125
	0	0	2.71739e-05	0.000416667	0.000267857
	9.92063e-06	9.92063e-06	0.000208333	0.000267857	0.000416667
	0	0	0.000625	0.00025	0.0003125
	0	0	0	0	5.43478e-05
	5e-05	2.08333e-05	0.0003125	0.00025	0.0025
	0.00125	0.0003125	0.00125	0.003125	0.000625
	0.000416667	0.000625	0.001875	0.005625	0.00125
	0	2.71739e-05	4.62963e-05	0.000138889	0.001875
	9.92063e-06	9.92063e-06	0.000138889	6.94444e-05	8.92857e-05
	8.33333e-05	9.92063e-06	0	9.92063e-06	0
	9.92063e-06	5.95238e-05	0.000416667	0.000178571	8.33333e-05
	0.000208333	0.00025	0.00125	0.005625	0.013125
	0	0	9.92063e-06	0.0003125	0.000625
	0	0	0	0	0
	0	5.68182e-05	0.00025	0.00125	0.00125
	2.31481e-05	3.20513e-05	0.00015625	0.00015625	0.00125
	0	8.33333e-05	0.00125	0.003125	0.003125
	0	0	0	0	5e-05
	9.92063e-06	9.92063e-06	0.000113636	0.0003125	0.000113636
	0.000234375	0.00125	0.000125	0.00125	0.00015625
	0	0	0.000178571	0.000416667	0.00104167
	9.92063e-06	0	8.33333e-05	3.57143e-05	0.000104167
	0	0	0	0	9.92063e-06
	0	0	0	0.000113636	5e-05
	0	9.92063e-06	9.92063e-06	9.92063e-06	0.00046875
	0.00025	0.000625	0.001875	0.00125	0.005625
	0.049375	0.015	0.028125	0.03875	0.01375
	0.005625	0.00375	0.0025	0.00375	0.00125
	0	0	0	0	0
	0	0	0.00025	0.00125	0.000138889
	0.00015625	7.5e-05	0.000113636	0.0003125	0.000625
	0	0	9.92063e-06	0	0.000178571
	9.61538e-05	0.0003125	0.00125	0.005	0.014375
	4.16667e-05	9.92063e-06	3.37838e-05	0.00015625	0.00125
	9.92063e-06	0	0	0.000125	0.000125
	0	0	0	0.000625	0.000625
	0	0	2.11864e-05	0.00125	0.00125
	0.01	0.04	0.015	0.0075	0.023125
	0	0	0	0.000138889	6.94444e-05
	0.000375	0.003125	0.008125	0.0025	0.001875
	0.0015625	0.00125	0.00104167	0.000208333	0.000416667
	5e-05	0.000178571	0.00125	0.0025	0.000625
	0.0003125	0.00125	0.001875	0.00125	0.0025
	0	0	0	9.61538e-05	0.00125
	0	0	0	9.92063e-06	0
	0.00152542	0.00148571	0.00151787	0.00196164	0.00215537
