# Supplementary material
Source: ML conference proceedings conference paper supplement (https://openreview.net/forum?id=lDbjooxLkD)
Supplement: supplementary_material [file attachment]

## Sheet: pass_until
	0.03b	0.1b	0.2b	0.5b	0.9b	1.5b
0	0	0	0	0.000208333	0.00015625	0.003125
0	0	0	0	0	0	0
0	0	0.00125	0.0009375	0.005	0.004375	0.008125
0	0	0	0	0.000625	0.000625	0.00125
0	0	0	0	0	0.000625	0.005
0	0	0	0	0	0	0.000208333
0	0	0	0	0	0	0
0	0	0	0.000625	0.0575	0.116875	0.2875
0	0	0	0	0	0.0075	0.0375
0	0	0	0	0.000208333	0.003125	0.003125
0	0	0	0	0	0	0.00015625
0	0	0	0	0.000625	0.000625	0.0125
0	0	0	0	0.001875	0.009375	0.025
0	0	0	0.000625	0.000625	0.008125	0.06375
0	0	0	0	0.00015625	0.0003125	0.003125
0	0	0.000208333	0.000125	0.004375	0.000625	0.00375
0	0	0	0	0.004375	0.010625	0.021875
0	0	0	0	0	0	0.000208333
0	0	0	0	0.000625	0.001875	0.008125
0	0	0	0	0	0	0
0	0	0	0	0	0	0
0	0	0	0	0	0.000125	0.001875
0	0	0.00125	0.0025	0.044375	0.041875	0.2625
0.0025	0.00375	0.05125	0.350625	0.3625	0.568125	0.796875
0	0	0	0	0.000625	0.003125	0.0075
0	0	0	0	0	8.92857e-05	0.001875
0	0	0	0.00015625	0.001875	0.0775	0.0325
0	0	0	0	0	0.003125	0.024375
0.020625	0.015	0.02625	0.21875	0.428125	0.55	0.6025
0	0	0.000625	0.014375	0.1425	0.361875	0.65125
0	0	0	0	0.01125	0.033125	0.339375
0	0	0	0	0.00125	0.066875	0.178125
0	0	0	0	0	0	0
0	0	0	0	0	0	0.00015625
0.0003125	0.000125	0.009375	0.018125	0.029375	0.184375	0.26875
0.000625	0.00125	0.001875	0.04625	0.191875	0.31625	0.480625
0	0	0	0	0	0	0
0	0	0	0	0	0	0
0.00015625	0	0.000625	0.035	0	0.000625	0.000625
0	0	0	0	0	0	0
0	0	0	0	0.000104167	0.0003125	0.0003125
0	0	0.0025	0.000625	0.0025	0.004375	0.00375
0.00015625	0	0.0003125	0.005625	0.095625	0.21125	0.37125
0	0	0	0.00125	0.001875	0.00125	0.000625
0	0	0	0	0	0	0.003125
0	0	0.000625	0.00375	0.004375	0.00625	0.031875
0	0	0	0	0	0	0
0	0	0	0	0.000625	0.00015625	0.003125
0	0	0	0	0.005	0.079375	0.1575
0	0	0	0	0.00625	0.009375	0.009375
5.20833e-05	0.0003125	0.00125	0.0025	0.005625	0.023125	0.028125
0	0	0	0	0	0.0003125	0.0275
0	0	0.000208333	0.00375	0.02125	0.023125	0.08625
0.00125	0.000625	0.004375	0.221875	0.72625	0.9	0.963125
0	0	0	0	0.001875	0.029375	0.016875
0	0	0	0.000625	0.010625	0.096875	0.413125
0	0	0	0	0	0	0.000625
0	0	0	0	0	0.000625	0.000625
0	0	0.00015625	0.0003125	0.001875	0.030625	0.189375
0	0	0	0	0	0.0003125	0.001875
0.000208333	0	0	0.0025	0.025	0.091875	0.240625
0	0	0	0	0	0	0.009375
0	0	0	0.000208333	0	0	0.0003125
0	0	0	0	0.000625	0.003125	0.010625
0	0	0	0	0	0	0
0	0	0	0	0	0	0
0	0	0	0	0.000125	0.000625	0.00125
0	0	0	0	0	0	0
0	0	0	0	0	0	0
0	0	0	0	0	0	0
0	0	0	0	0	0	0
0	0	0	0	0	0	0
0	0	0	0	0	0.000125	0.000125
0	0	0	0	8.92857e-05	0	0.000125
0	0	0	0	0	0	0.000208333
0	0	0	0	0	0	0
0	0	0	0	0	0.000125	0.00125
0	0	0	0	0	0	0
0	0	0	0	0	0	0
0	0	0	0	0	0	0
0	0	0	0	0	0	0
0	0	0	0	0	0	0
0	0	0	0	0	0.000625	0.001875
0	0	0	0	0	0	0
0	0	0	0	0	0	0.000125
0	0	0	0	0	0	0
0	0	0	0	0	0	0.00015625
0	0	0	0	0	0	0
0	0	0	0	0	0	0
0	0	0	0	0	0	0
0	0	0	0	0	0.000208333	0.000625
0	0	0	0	0.000208333	0.000208333	0.00125
0	0	0	0	0	0	0
0	0	0	0	0	0	0
0	0	0	0	0	0	0
0.000125	0	0.000208333	0.004375	0.000208333	0.000625	0.0003125
0	0	0	0	0	0	0.000416667
0	0	0	0	0	0.00015625	0.000125
0	0	0	0	0	0	0
0	0	0	0	0	0	0
0	0	0	0	0	0	0.000125
0	0	0	0	0.000125	0.0003125	0.005625
0	0	0	0	0	0	0.0003125
0	0	0	0	0	0	0
0	0	0	0	0	0	0
0	0	0	0	0	0	0
0	0	0	0	0	0	0
0	0	0	0	0	0	0
0	0	0	0	0	0	0
0	0	0	0	0.00015625	0.000208333	0.00125
0	0	0	0	0	0.000125	0.000625
0	0	0	0	0	0	0
0	0	0	0	0	0	0
0	0	0	0	0	0	0
0	0	0	0	0	0	0.0003125
0	0	0	0	0	0	0
0	0	0	0	0	0	0
0	0	0	0	0	0	0
0	0	0	0	0	0	0
0	0	0	0	0	0	0
0	0	0	0	0	0.0003125	0.0003125
0	0	0	0	0	0	0.00125
0	0	0	0	0	0	0
0	0	0	0	0	0	0
0	0	0	0	0	0.0003125	0.0003125
0	0	0	0	0	0	0
0	0	0	0	0	0	0
0	0	0	0	0	0	0.00046875
0	0	0	0	0	0	0
0	0	0	0	0	0	0
0	0	0	0	0	0	0
0	0	0	0	0	0	0
0	0	0	0	0	0	0
0	0	0	0	0	0	0.000104167
0	0	0	0	0	0.0003125	0
0	0	0	0.00015625	0.00015625	0.0003125	0.000625
0	0	0	0	0	0	0
0	0	0	0	0.000208333	0	0
0	0	0	0.0003125	0.000625	0.000208333	0.000625
0	0	0	0	0.000208333	0.000104167	0.000625
0	0	0	0	0	0	0
0	0	0	0	0	0	0
0	0	0	0	0	0	0
0	0	0	0	0	0	0
0	0	0	0	0	0	0
0	0	0	0	0	0	0
0	0	0	0	0	0	0
0	0	0	0	0	0	0
0	0	0	0	0	0	0
0	0	0	0	0	0	0
0	0	0	0	0	0	0.000104167
0	0	0	0	0	0	0
0	0	0	0	0.000625	0.000104167	0.0075
0	0	0	0	0	0	0
0	0	0	0.000125	0.00125	0.000208333	0.00125
0	0	0	0	0	0	0
0	0	0	0	0	0	0
0	0.000104167	0	0	0	0	0.00015625
0	0	0	0	0	0	0
0	0	0	0	0	0	0
0	0	0	0	0	0	0
0	0	0	0	0	0	0
0	0	0	0	0	0.000625	0.028125
0	0	0	0.0003125	0	0	0

## Sheet: emoji_pass_until
0.03b	0.1b	0.2b	0.5b	0.9b	1.5b	2.4b		1.5b 新
0	0	0	2.55102e-05	0.000625	0.00125	0.001875		0.0025
0	0	0	2.71739e-05	0.000416667	0.000267857	0.000625		0.001875
0	9.92063e-06	9.92063e-06	0.000208333	0.000267857	0.000416667	0.00046875		0.0009375
0	0	0	0.000625	0.00025	0.0003125	0.00125		0.0003125
0	0	0	0	0	5.43478e-05	3.47222e-05		4.46429e-05
0	5e-05	2.08333e-05	0.0003125	0.00025	0.0025	0.0009375		0.005625
2.31481e-05	0.00125	0.0003125	0.00125	0.003125	0.000625	0.000625		0.0025
0	0.000416667	0.000625	0.001875	0.005625	0.00125	0.004375		0.00375
0	0	2.71739e-05	4.62963e-05	0.000138889	0.001875	0.0009375		0.000625
0	9.92063e-06	9.92063e-06	0.000138889	6.94444e-05	8.92857e-05	0.000133929		3.28947e-05
0	8.33333e-05	9.92063e-06	0	9.92063e-06	0	9.92063e-06		2.15517e-05
0	9.92063e-06	5.95238e-05	0.000416667	0.000178571	8.33333e-05	0.000125		0.000375
9.92063e-06	0.000208333	0.00025	0.00125	0.005625	0.013125	0.045625		0.018125
5.95238e-05	0	0	9.92063e-06	0.0003125	0.000625	0.000625		0.0009375
0	0	0	0	0	0	0		0
0	0	5.68182e-05	0.00025	0.00125	0.00125	0.00625		0.00125
0	2.31481e-05	3.20513e-05	0.00015625	0.00015625	0.00125	0.000178571		0.0003125
0.700625	0.568125	0.70875	0.564375	0.668125	0.559375	0.59625		0.58875
0	0	8.33333e-05	0.00125	0.003125	0.003125	0.00875		0.005
0	0	0	0	0	5e-05	9.92063e-06		2.35849e-05
3.20513e-05	9.92063e-06	9.92063e-06	0.000113636	0.0003125	0.000113636	0.0025		0.000416667
0.000178571	0.000234375	0.00125	0.000125	0.00125	0.00015625	0.0009375		0.00125
0	0	0	0.000178571	0.000416667	0.00104167	0.000416667		0.000208333
0	9.92063e-06	0	8.33333e-05	3.57143e-05	0.000104167	0.000416667		0.0003125
0	0	0	0	0	9.92063e-06	0.000138889		0.000208333
0	0	0	0	0.000113636	5e-05	0.000625		0.00015625
0	0	9.92063e-06	9.92063e-06	9.92063e-06	0.00046875	0.000625		0.000625
0.000625	0.00025	0.000625	0.001875	0.00125	0.005625	0.00125		0.0015625
0.035625	0.049375	0.015	0.028125	0.03875	0.01375	0.035		0.019375
0.013125	0.005625	0.00375	0.0025	0.00375	0.00125	0.00125		0.00125
0	0	0	0	0	0	0.00015625		0
0	0	0	0.00025	0.00125	0.000138889	0.00125		0.000416667
3.20513e-05	0.00015625	7.5e-05	0.000113636	0.0003125	0.000625	0.00125		0.000416667
0	0	0	9.92063e-06	0	0.000178571	0.0009375		0.000138889
0	9.61538e-05	0.0003125	0.00125	0.005	0.014375	0.005625		0.015
5.43478e-05	4.16667e-05	9.92063e-06	3.37838e-05	0.00015625	0.00125	0.00125		0.00125
0	9.92063e-06	0	0	0.000125	0.000125	0.0003125		0.00125
0	0	0	0	0.000625	0.000625	0.0009375		0.000625
0	0	0	2.11864e-05	0.00125	0.00125	0.00025		0.000625
0.001875	0.01	0.04	0.015	0.0075	0.023125	0.015625		0.04
0	0	0	0	0.000138889	6.94444e-05	0.000208333		4.16667e-05
0.138125	0.10125	0.115	0.196875	0.1825	0.1475	0.19125		0.155
8.92857e-05	0.000375	0.003125	0.008125	0.0025	0.001875	0.005625		0.004375
0	0	0.000178571	0.000375	0.000375	7.35294e-05	0.00125		0.00046875
0.000625	0.000625	0.000416667	0.001875	0.000625	0.0003125	0.0025		0.0009375
0.000625	0.0015625	0.00125	0.00104167	0.000208333	0.000416667	0.00125		0.0009375
0.000138889	5e-05	0.000178571	0.00125	0.0025	0.000625	0.005625		0.00125
7.8125e-05	0.0003125	0.00125	0.001875	0.00125	0.0025	0.004375		0.001875
0	0	0	0	9.61538e-05	0.00125	0.0015625		0.000625
0	0	0	0	9.92063e-06	0	0.0003125		3.78788e-05

## Sheet: test_loss0911
0.03b	0.1b	0.2b	0.5b	0.9b	1.5b
1.80914	1.06606	0.863107	0.811462	0.669966	0.630274
1.30225	0.968134	0.731039	0.560129	0.545119	0.432149
2.70778	2.06602	1.64404	1.34012	1.50259	1.51422
1.5047	1.04163	0.74987	0.687628	0.561218	0.50608
1.38062	1.19951	0.587925	0.439436	0.368929	0.305661
1.20457	0.995728	0.902934	0.699207	0.506719	0.425897
1.68234	1.2561	0.923944	0.732221	0.646257	0.569378
1.99302	1.20644	0.642879	0.587222	0.507897	0.418047
1.45975	1.0516	0.864036	0.634324	0.527547	0.436093
1.21043	0.901924	0.708677	0.537464	0.521081	0.414386
1.61444	1.1317	0.965377	0.887229	0.844815	0.736627
1.39885	0.933282	0.70187	0.706455	0.6316	0.574735
1.30938	1.01339	0.706681	0.551976	0.476747	0.407054
1.82956	1.52784	1.04086	0.648579	0.553669	0.377897
1.15088	0.793921	0.720519	0.641195	0.578855	0.586556
1.48659	0.859907	0.72605	0.556807	0.65688	0.67448
1.94552	1.54224	1.59207	0.735493	0.640706	0.745694
2.36718	1.55719	1.11672	0.796021	0.801114	0.642081
1.62888	0.98707	0.795664	0.552774	0.454354	0.409103
1.60964	1.21311	0.977678	0.65047	0.578334	0.401627
1.45814	1.06244	0.807112	0.716365	0.600796	0.507993
1.34642	0.932612	0.713466	0.509719	0.452063	0.377678
1.30509	0.702036	0.623556	0.51041	0.43491	0.38025
0.943828	0.679168	0.223854	0.272929	0.284277	0.206181
1.39276	0.906229	0.653403	0.642291	0.60847	0.570173
1.67684	1.32223	0.955419	0.774107	0.641953	0.599643
1.93112	1.64402	1.47095	1.21254	1.0152	0.965986
3.2024	2.80284	2.12955	1.29653	1.12035	0.662103
0.733163	0.835249	0.471704	0.411762	0.339894	0.37661
1.45093	0.795908	0.59472	0.42242	0.325134	0.242201
1.49618	1.47729	1.15634	0.855902	0.77453	0.557912
1.10887	0.845894	0.604972	0.466739	0.405947	0.391076
1.99813	1.57886	1.29379	1.00783	0.905489	0.779293
1.33903	1.06181	0.862407	0.818125	0.781941	0.774711
1.63448	0.822293	0.742981	0.581899	0.444659	0.461055
1.33342	1.06242	0.943324	0.694249	0.573284	0.498881
1.52729	1.18043	0.943806	0.853989	0.799199	0.717863
1.59416	1.22207	0.939271	0.856013	0.739856	0.744111
1.65961	0.975651	0.566652	1.04314	1.1284	1.32351
1.61642	1.25495	1.0858	0.883908	0.748704	0.703997
1.01937	0.745334	0.450859	0.312686	0.265452	0.253423
2.73082	2.25408	2.00015	1.90702	1.58093	1.76483
1.98442	1.68251	1.55732	1.26275	1.13214	0.992472
1.36223	1.01998	0.763499	0.583513	0.525053	0.529046
2.4798	1.84387	1.02266	0.803414	0.576541	0.462968
1.98173	1.6307	1.24333	1.54332	1.37028	1.16636
1.63157	1.32167	1.07565	0.810385	0.739656	0.640268
1.21311	0.965562	0.700681	0.505596	0.380934	0.255297
1.20838	0.849703	0.621339	0.443563	0.323763	0.257102
1.57798	1.3993	1.09044	0.798655	0.770605	0.674398
0.450348	0.280026	0.281222	0.22917	0.182822	0.172435
1.76703	1.57279	1.15838	0.751106	0.590811	0.598189
1.16385	0.898297	0.684662	0.549259	0.591085	0.488092
1.45888	1.17722	0.474907	0.22211	0.184807	0.132204
1.5075	1.05959	0.889834	0.614913	0.401377	0.469465
0.910958	0.663708	0.391414	0.262771	0.249731	0.172362
1.43886	1.0996	0.889756	0.790713	0.705849	0.558626
1.53848	1.2137	0.956931	1.02121	0.751897	0.730559
1.35121	0.922219	0.660301	0.548207	0.476902	0.436129
1.33101	0.976168	0.801985	0.649214	0.57128	0.548832
2.09934	1.82905	1.32388	0.970579	1.02673	0.768482
1.41719	1.03412	0.856197	0.765633	0.639261	0.543925
2.0829	1.66395	1.56716	1.33899	1.37062	1.195
0.801554	0.532403	0.443201	0.313965	0.288771	0.197648
2.49603	1.84253	1.36935	0.974984	0.89565	0.71603
1.51494	1.11259	0.87704	0.610277	0.559808	0.564857
2.22955	1.88895	1.30703	1.03848	0.926045	0.938559
1.78248	1.53028	1.18062	0.993745	0.940151	0.843954
2.13932	1.65513	1.24095	0.973345	0.976794	0.74913
1.53658	1.33117	1.04865	0.870911	0.853644	0.801533
2.97857	2.25642	1.82486	1.47206	1.37676	0.996758
1.90423	1.6479	1.21442	0.970857	0.818071	0.689883
1.58566	1.14903	0.826858	0.642121	0.589336	0.531172
1.14213	0.875666	0.749162	0.550609	0.541411	0.53613
1.02169	0.800832	0.621846	0.564234	0.526116	0.495725
1.31143	1.03848	0.73557	0.629459	0.571504	0.53873
1.87946	1.57801	1.39847	1.18045	0.972391	0.891264
3.10448	2.67098	2.31587	1.82819	1.61084	1.48333
1.445	1.15321	0.913374	0.681016	0.64768	0.599898
3.51428	2.37816	1.67035	1.29399	1.00141	1.08387
1.07764	0.783663	0.70918	0.618887	0.623609	0.597099
0.827244	0.633298	0.408825	0.242067	0.20366	0.167373
1.21982	0.925161	0.695613	0.571772	0.49769	0.422749
2.26052	1.90329	1.71551	1.6279	1.66276	1.63251
2.43655	2.02803	1.66414	1.05298	0.979884	0.843708
1.72918	1.38363	0.944318	0.911431	0.885697	0.748528
2.29036	1.74328	1.33258	1.07785	1.09162	0.946696
1.45039	1.1195	0.749318	0.573322	0.541722	0.500672
2.53345	2.24952	2.08324	1.67132	1.68259	1.67006
1.77554	1.42164	1.13487	0.881835	0.779015	0.821774
1.75172	1.4666	1.17294	1.26156	0.963895	0.873932
2.86927	2.4456	1.86079	1.51042	1.50052	1.42573
1.42384	1.05756	0.838905	0.666387	0.599159	0.532091
3.10862	2.30258	1.72515	1.14101	0.969528	0.852227
1.70114	1.39195	1.11618	0.839825	0.696938	0.639787
1.39097	1.20532	0.954926	0.864453	0.844491	0.707926
1.04309	0.720812	0.570662	0.349884	0.284005	0.242952
2.17596	1.54002	1.47457	1.17602	1.40235	1.54979
1.79183	1.368	1.14782	0.743878	0.60921	0.483448
1.77059	1.40111	1.21262	1.02504	0.995943	0.935697
1.85628	1.63553	1.20244	1.21618	1.09987	1.07655
1.09165	0.922043	0.76752	0.638383	0.581631	0.538818
1.23835	0.974662	0.716414	0.730831	0.840203	0.819567
1.66432	1.57109	1.28706	1.09006	1.18433	0.965845
1.56617	1.34957	1.19847	0.97994	0.888582	0.831509
1.06132	0.754084	0.512318	0.471572	0.396588	0.406094
1.16919	0.975843	0.777463	0.646379	0.573504	0.582037
0.997811	0.851326	0.662665	0.517836	0.496477	0.425068
2.08091	1.73396	1.51239	1.27666	1.17691	1.0234
1.5744	1.2654	1.03472	0.942255	0.821156	0.836485
1.38842	0.947936	0.712851	0.651673	0.604388	0.5283
1.86422	1.51333	1.32042	1.08591	1.05149	0.999944
2.05866	1.37346	1.41348	1.1865	0.982518	0.892672
2.35629	1.9554	1.64462	1.14477	1.04808	0.869927
1.37274	1.26332	1.07295	0.945739	0.913006	0.863741
2.55362	2.13507	1.67681	1.46382	1.4536	1.48905
2.32143	1.68913	1.39651	1.07971	0.950455	0.96903
1.89625	1.34392	0.97983	0.735754	0.640105	0.496758
1.58445	1.20719	0.890637	0.76182	0.62898	0.553229
1.3749	1.10561	0.893253	0.704297	0.707368	0.665588
1.96464	1.4773	1.12834	0.986698	0.953451	0.787522
2.26822	1.44784	1.21166	0.989208	1.01787	0.941517
2.02571	1.97729	1.81689	1.19892	1.24836	1.01676
1.38923	1.14029	0.912058	0.858734	0.811353	0.688224
1.26973	1.00086	0.823616	0.527215	0.46738	0.360363
2.09919	1.58874	1.30705	1.20846	1.1385	1.0101
1.67951	1.40912	1.133	1.04199	1.00502	0.920458
1.29667	1.04771	0.790269	0.655725	0.563927	0.462382
2.42977	2.26753	1.77622	1.50585	1.37027	1.15215
1.04061	0.819422	0.699134	0.564551	0.519103	0.492347
1.11988	0.960153	0.831432	0.660983	0.672314	0.671606
1.95059	1.35634	1.14785	0.86283	0.761447	0.720608
1.42706	1.1056	0.83638	0.735642	0.684093	0.635334
2.07466	1.61097	1.29829	0.959371	0.927738	1.01056
2.68382	2.34655	2.19083	1.70828	1.77804	1.65401
1.54914	1.26118	0.980772	0.810276	0.844226	0.81174
1.80525	1.25195	1.03533	0.682441	0.626597	0.645084
1.38909	1.10839	0.750929	0.75534	0.660883	0.662572
2.81218	2.11936	2.05913	1.54372	1.78593	1.38279
1.62349	1.37971	1.11916	0.869954	0.697648	0.636408
1.34313	1.06204	0.861647	0.694796	0.62106	0.554969
1.3944	1.14285	0.993953	0.855423	0.76225	0.673597
1.11565	0.888865	0.791382	0.594351	0.57932	0.503812
1.69424	1.21172	1.04014	0.817322	0.790646	0.71743
1.70076	1.47231	1.09307	0.898732	0.824715	0.743157
2.03565	1.80303	1.60782	1.37722	1.22837	1.07254
1.48148	1.25011	1.10432	0.889586	0.844451	0.742861
1.55683	1.07187	0.848717	0.601331	0.615329	0.531006
1.50079	0.926731	0.794241	0.554206	0.513403	0.503745
1.43492	0.964011	0.761353	0.632188	0.563496	0.554381
1.33718	1.12487	0.916603	0.669915	0.687064	0.509107
2.76441	2.11997	2.00895	1.57676	1.68269	1.40511
2.05526	1.39456	1.10509	0.742503	0.844465	0.635251
1.67422	1.27573	1.09313	0.883727	0.844147	0.743321
1.77367	1.28565	1.07927	0.986964	0.829502	0.789635
1.43339	1.1163	0.866121	0.671812	0.644369	0.433702
2.54399	2.14919	1.80858	1.64158	1.31152	1.07077
2.04354	1.58318	1.30221	1.00686	0.943408	0.727742
2.56553	2.0319	1.72832	1.66658	1.32119	1.08094
3.01029	2.19059	1.6281	1.14012	1.1578	1.04818
2.22092	2.04043	1.67001	1.64372	1.50072	1.27959
1.99032	1.60565	1.37021	1.06972	0.996594	0.971512
1.86344	1.397	0.912367	0.862526	0.771295	0.579477
1.76093	1.32554	0.956027	0.829649	0.87981	0.741699

## Sheet: 0902result
0	0	0.00125	0	0	0	0	0	0	0	0	0	0	0	0	0	0	0	0	0	0	0	0.000208333	0.031875	0	0	0	0	0.026875	0	0	0	0	0	0.00125	0.0125	0	0	0	0	0	0	0.000625	0	0	0.00125	0	0	0.000625	0
0	0	0.001875	0.00125	0	0	0	0.001875	0	0	0	0	0	0	0.0003125	0	0.00125	0	0	0	0	0	0.008125	0.24125	0	0	0	0	0.2925	0.005625	0.0003125	0	0	0	0.004375	0.075625	0	0	0.000625	0	0	0.000104167	0.00625	0.000104167	0	0.0025	0	0	0.000625	0.000625
0	0	0.000625	0.0003125	0	0	0	0.020625	0	0	0	8.92857e-05	0.000625	0.0003125	0	0.00375	0.005625	0	0	0	0	0	0.06625	0.371875	0.0003125	0	0	0	0.2775	0.026875	0.01	0	0	0	0.018125	0.18125	0	0	0	0	0	0.00015625	0.01875	0.000208333	0	0.0475	0	0	0.006875	0.000625
0.000625	0	0.00875	0.000625	0.000625	0	0	0.35	0.003125	0.000625	0	0.0003125	0.01	0.011875	0.001875	0.019375	0.050625	0	0.001875	0	0	0.000625	0.6325	0.610625	0.00125	0	0.000625	0.028125	0.36125	0.298125	0.12875	0.011875	0	0	0.150625	0.34125	0	0	0	0	0.00015625	0.003125	0.33	0	0.0003125	0.681875	0	0.000625	0.3875	0.005
										0.0258	0.237	0.956	5.6
0	0	0	0.000625		10	10	10	3.20412		2.90309	2.727	3.20412	2.05799
0	0	0	0		10	10	10	10		3.68124	2.09018	1.17881	0.198939
0.00125	0.001875	0.000625	0.00875		2.90309	2.727	3.20412	2.05799		1.49655	0.617533	0.429603	0.214225
0	0.00125	0.0003125	0.000625		10	2.90309	3.50515	3.20412		1.57065	0.533874	0.556737	0.442192
0	0	0	0.000625		10	10	10	3.20412		2.90309	2.35902	1.74172	0.822103
0	0	0	0		10	10	10	10		1.90309	1.12133	0.741722	0.466927
0	0	0	0		10	10	10	10		3.20412	2.20412	1.727	0.481486
0	0.001875	0.020625	0.35		10	2.727	1.68561	0.455932		2.90309	2.60206	1.32331	0.166295
0	0	0	0.003125		10	10	10	2.50515		3.20412	3.20412	2.16273	0.411728
0	0	0	0.000625		10	10	10	3.20412		3.20412	2.90309	2.09018	1.2264
0	0	0	0		10	10	10	10		1.8617	0.330218	0.114568	0.000815066
0	0	8.92857e-05	0.0003125		10	10	4.04922	3.50515
0	0	0.000625	0.01		10	10	3.20412	2
0	0	0.0003125	0.011875		10	10	3.50515	1.92537
0	0.0003125	0	0.001875		10	3.50515	10	2.727
0	0	0.00375	0.019375		10	10	2.42597	1.71276
0	0.00125	0.005625	0.050625		10	2.90309	2.24988	1.29563
0	0	0	0		10	10	10	10
0	0	0	0.001875		10	10	10	2.727
0	0	0	0		10	10	10	10
0	0	0	0		10	10	10	10
0	0	0	0.000625		10	10	10	3.20412
0.000208333	0.008125	0.06625	0.6325		3.68124	2.09018	1.17881	0.198939
0.031875	0.24125	0.371875	0.610625		1.49655	0.617533	0.429603	0.214225
0	0	0.0003125	0.00125		10	10	3.50515	2.90309
0	0	0	0		10	10	10	10
0	0	0	0.000625		10	10	10	3.20412
0	0	0	0.028125		10	10	10	1.55091
0.026875	0.2925	0.2775	0.36125		1.57065	0.533874	0.556737	0.442192
0	0.005625	0.026875	0.298125		10	2.24988	1.57065	0.525602
0	0.0003125	0.01	0.12875		10	3.50515	2	0.890253
0	0	0	0.011875		10	10	10	1.92537
0	0	0	0		10	10	10	10
0	0	0	0		10	10	10	10
0.00125	0.004375	0.018125	0.150625		2.90309	2.35902	1.74172	0.822103
0.0125	0.075625	0.18125	0.34125		1.90309	1.12133	0.741722	0.466927
0	0	0	0		10	10	10	10
0	0	0	0		10	10	10	10
0	0.000625	0	0		10	3.20412	10	10
0	0	0	0		10	10	10	10
0	0	0	0.00015625		10	10	10	3.80618
0	0.000104167	0.00015625	0.003125		10	3.98227	3.80618	2.50515
0.000625	0.00625	0.01875	0.33		3.20412	2.20412	1.727	0.481486
0	0.000104167	0.000208333	0		10	3.98227	3.68124	10
0	0	0	0.0003125		10	10	10	3.50515
0.00125	0.0025	0.0475	0.681875		2.90309	2.60206	1.32331	0.166295
0	0	0	0		10	10	10	10
0	0	0	0.000625		10	10	10	3.20412
0.000625	0.000625	0.006875	0.3875		3.20412	3.20412	2.16273	0.411728
0	0.000625	0.000625	0.005		10	3.20412	3.20412	2.30103
0	0	0.00125	0.003125		10	10	2.90309	2.50515
0	0.000125	0.00125	0.0375		10	3.90309	2.90309	1.42597
0.000625	0.00125	0.008125	0.059375		3.20412	2.90309	2.09018	1.2264
0.01375	0.4675	0.768125	0.998125		1.8617	0.330218	0.114568	0.000815066
0	0.000208333	0	0.010625		10	3.68124	10	1.97367
0	0	0.0003125	0.031875		10	10	3.50515	1.49655
0	0	0	8.92857e-05		10	10	10	4.04922
0	0	0	0.00015625		10	10	10	3.80618
0	0	0.000625	0.05125		10	10	3.20412	1.29031
0	0	0	0		10	10	10	10
0.000125	0.0025	0.023125	0.253125		3.90309	2.60206	1.63592	0.596665
0	0	0	0		10	10	10	10
0	0	0	0		10	10	10	10
0	0	0	0		10	10	10	10
0	0	0	0		10	10	10	10
0	0	0	0		10	10	10	10
0	0	0	0.000625		10	10	10	3.20412
0	0	0	0		10	10	10	10
0	0	0	0		10	10	10	10
0	0	0	0		10	10	10	10
0	0	0	0		10	10	10	10
0	0	0	0		10	10	10	10
0	0	0	0		10	10	10	10
0	0	0	0		10	10	10	10
0	0	0	0		10	10	10	10
0	0	0	0		10	10	10	10
0	0	0	0.0003125		10	10	10	3.50515
0	0	0	0		10	10	10	10
0	0	0	0		10	10	10	10
0	0	0	0		10	10	10	10
0	0	0	0		10	10	10	10
0	0	0	0		10	10	10	10
0	0	0	0.000625		10	10	10	3.20412
0	0	0	0		10	10	10	10
0	0	0	0.000625		10	10	10	3.20412
0	0	0	0		10	10	10	10
0	0	0	0		10	10	10	10
0	0	0	0		10	10	10	10
0	0	0	0		10	10	10	10
0	0	0	0.000625		10	10	10	3.20412
0	0	0	0.00015625		10	10	10	3.80618
0	0	0	0		10	10	10	10
0	0	0	0		10	10	10	10
0	0	0	0		10	10	10	10
0	0	0	0		10	10	10	10
8.92857e-05	0.000625	0	0		4.04922	3.20412	10	10
0	0	0	0		10	10	10	10
0	0	0	0		10	10	10	10
0	0	0	0		10	10	10	10
0	0	0	0		10	10	10	10
0	0	0	0.0003125		10	10	10	3.50515
0	0	0.000208333	0.000625		10	10	3.68124	3.20412
0	0	0	0		10	10	10	10
0	0	0	0		10	10	10	10
0	0	0	0		10	10	10	10
0	0	0	0		10	10	10	10
0	0	0	0		10	10	10	10
0	0	0	0		10	10	10	10
0	0	0	0		10	10	10	10
0	0	0	0.000625		10	10	10	3.20412
0	0	0	0.000125		10	10	10	3.90309
0	0	0	0		10	10	10	10
0	0	0	0		10	10	10	10
0	0	0	0		10	10	10	10
0	0	0	0		10	10	10	10
0	0	0	0		10	10	10	10
0	0	0	0		10	10	10	10
0	0	0	0		10	10	10	10
0	0	0	0		10	10	10	10
0	0	0	0		10	10	10	10
0	0	0.000625	0.00015625		10	10	3.20412	3.80618
0	0	0	0		10	10	10	10
0	0	0	0		10	10	10	10
0	0	0	0		10	10	10	10
0	0	0	0		10	10	10	10
0	0	0	0		10	10	10	10
0	0	0	0		10	10	10	10
0	0	8.92857e-05	0		10	10	4.04922	10
0	0	0	0		10	10	10	10
0	0	0	0		10	10	10	10
0	0	0	0		10	10	10	10
0	0	0	0		10	10	10	10
0	0	0	0		10	10	10	10
0	0	0	0		10	10	10	10
0	0	0	0		10	10	10	10
0	0	0	0		10	10	10	10
0	0	0	0		10	10	10	10
0	0	0	0		10	10	10	10
0	0.0003125	0.000104167	0.005		10	3.50515	3.98227	2.30103
0	0	0	0		10	10	10	10
0	0	0	0		10	10	10	10
0	0	0	0		10	10	10	10
0	0	0	0		10	10	10	10
0	0	0	0		10	10	10	10
0	0	0	0		10	10	10	10
0	0	0	0		10	10	10	10
0	0	0	0.000625		10	10	10	3.20412
0	0	0	0		10	10	10	10
0	0	0	0		10	10	10	10
0	0	0	0		10	10	10	10
0	0	0	0		10	10	10	10
0	0	0	0.000208333		10	10	10	3.68124
0	0	0	0		10	10	10	10
0	0	0	0		10	10	10	10
0	0	0.000208333	0.0003125		10	10	3.68124	3.50515
0	0	0	0		10	10	10	10
0	0	0	0		10	10	10	10
0	0.00015625	0	0		10	3.80618	10	10
0	0	0	0		10	10	10	10
0	0	0	0		10	10	10	10
0	0	0	0		10	10	10	10
0	0	0	0		10	10	10	10
0	0	0.000208333	0.000625		10	10	3.68124	3.20412
0	0	0	0		10	10	10	10
[truncated: 114 more columns]

## Sheet: Sheet1
10	10	10	3.20412
10	10	10	10
2.90309	2.727	3.20412	2.05799
10	2.90309	3.50515	3.20412
10	10	10	3.20412
10	10	10	10
10	10	10	10
10	2.727	1.68561	0.455932
10	10	10	2.50515
10	10	10	3.20412
10	10	10	10
10	10	4.04922	3.50515
10	10	3.20412	2
10	10	3.50515	1.92537
10	3.50515	10	2.727
10	10	2.42597	1.71276
10	2.90309	2.24988	1.29563
10	10	10	10
10	10	10	2.727
10	10	10	10
10	10	10	10
10	10	10	3.20412
3.68124	2.09018	1.17881	0.198939
1.49655	0.617533	0.429603	0.214225
10	10	3.50515	2.90309
10	10	10	10
10	10	10	3.20412
10	10	10	1.55091
1.57065	0.533874	0.556737	0.442192
10	2.24988	1.57065	0.525602
10	3.50515	2	0.890253
10	10	10	1.92537
10	10	10	10
10	10	10	10
2.90309	2.35902	1.74172	0.822103
1.90309	1.12133	0.741722	0.466927
10	10	10	10
10	10	10	10
10	3.20412	10	10
10	10	10	10
10	10	10	3.80618
10	3.98227	3.80618	2.50515
3.20412	2.20412	1.727	0.481486
10	3.98227	3.68124	10
10	10	10	3.50515
2.90309	2.60206	1.32331	0.166295
10	10	10	10
10	10	10	3.20412
3.20412	3.20412	2.16273	0.411728
10	3.20412	3.20412	2.30103
10	10	2.90309	2.50515
10	3.90309	2.90309	1.42597
3.20412	2.90309	2.09018	1.2264
1.8617	0.330218	0.114568	0.000815066
10	3.68124	10	1.97367
10	10	3.50515	1.49655
10	10	10	4.04922
10	10	10	3.80618
10	10	3.20412	1.29031
10	10	10	10
3.90309	2.60206	1.63592	0.596665
10	10	10	10
10	10	10	10
10	10	10	10
10	10	10	10
10	10	10	10
10	10	10	3.20412
10	10	10	10
10	10	10	10
10	10	10	10
10	10	10	10
10	10	10	10
10	10	10	10
10	10	10	10
10	10	10	10
10	10	10	10
10	10	10	3.50515
10	10	10	10
10	10	10	10
10	10	10	10
10	10	10	10
10	10	10	10
10	10	10	3.20412
10	10	10	10
10	10	10	3.20412
10	10	10	10
10	10	10	10
10	10	10	10
10	10	10	10
10	10	10	3.20412
10	10	10	3.80618
10	10	10	10
10	10	10	10
10	10	10	10
10	10	10	10
4.04922	3.20412	10	10
10	10	10	10
10	10	10	10
10	10	10	10
10	10	10	10
10	10	10	3.50515
10	10	3.68124	3.20412
10	10	10	10
10	10	10	10
10	10	10	10
10	10	10	10
10	10	10	10
10	10	10	10
10	10	10	10
10	10	10	3.20412
10	10	10	3.90309
10	10	10	10
10	10	10	10
10	10	10	10
10	10	10	10
10	10	10	10
10	10	10	10
10	10	10	10
10	10	10	10
10	10	10	10
10	10	3.20412	3.80618
10	10	10	10
10	10	10	10
10	10	10	10
10	10	10	10
10	10	10	10
10	10	10	10
10	10	4.04922	10
10	10	10	10
10	10	10	10
10	10	10	10
10	10	10	10
10	10	10	10
10	10	10	10
10	10	10	10
10	10	10	10
10	10	10	10
10	10	10	10
10	3.50515	3.98227	2.30103
10	10	10	10
10	10	10	10
10	10	10	10
10	10	10	10
10	10	10	10
10	10	10	10
10	10	10	10
10	10	10	3.20412
10	10	10	10
10	10	10	10
10	10	10	10
10	10	10	10
10	10	10	3.68124
10	10	10	10
10	10	10	10
10	10	3.68124	3.50515
10	10	10	10
10	10	10	10
10	3.80618	10	10
10	10	10	10
10	10	10	10
10	10	10	10
10	10	10	10
10	10	3.68124	3.20412
10	10	10	10

## Sheet: test_loss0910
0.03b	0.1b	0.2b	0.5b	0.9b	1.5b		context 设置错误
2.08626	1.34767	1.25181	1.24654	1.02438	0.988338
1.4257	1.09389	0.897916	0.796906	0.722727	0.658868
5.22532	5.02982	6.08887	4.93685	5.17306	4.7327
1.83869	1.57279	1.41089	1.48209	1.31554	1.36944
1.82028	1.7662	1.36327	1.38004	1.17724	1.21051
1.43146	1.23586	1.25074	0.984154	0.871396	0.780977
1.83591	1.36894	1.0918	0.921777	0.849791	0.819593
3.05572	2.23601	2.23641	2.2057	1.93133	1.99212
1.77769	1.42222	1.47409	1.48211	1.2499	1.13635
1.49269	1.18932	1.06664	0.916416	0.857209	0.825237
1.83039	1.31534	1.2168	1.19515	1.14985	1.03283
1.60422	1.13748	1.04747	1.0252	1.0153	0.98024
1.65413	1.32917	1.16839	1.05649	0.996019	0.8625
2.42555	2.31684	1.85672	1.57641	1.63466	1.46689
1.52157	1.14636	1.31999	1.39316	1.20415	1.33384
2.14494	1.61379	1.90799	1.5214	1.52678	1.63819
3.25335	2.97344	3.65588	2.58696	2.22585	2.39902
2.75678	2.02329	1.61859	1.34782	1.33681	1.27673
1.9365	1.31459	1.18323	0.995484	0.819298	0.880533
1.6908	1.30311	1.07407	0.865523	0.724039	0.558213
1.55147	1.15376	0.979914	0.928645	0.810466	0.73708
1.78194	1.38869	1.18107	1.09921	1.04348	0.955961
2.20021	1.8023	2.00565	1.92713	1.76202	1.74001
2.30134	2.42072	3.25374	3.44495	2.92461	3.22055
2.02418	1.54887	1.58469	1.72557	1.57837	1.47852
1.78473	1.46356	1.12071	0.954504	0.810013	0.787877
2.31651	1.99502	1.87755	1.7231	1.49751	1.49303
5.2866	4.76979	5.25526	4.45285	3.43704	3.38955
2.55806	2.46387	3.20272	3.46821	2.77056	3.22412
2.30672	1.79095	1.84397	1.76817	1.56189	1.54253
2.46532	2.58979	2.70579	2.47216	2.16146	2.14128
1.40498	1.14609	1.01122	0.890721	0.873654	0.818134
2.20246	1.78398	1.61777	1.2629	1.20061	1.09214
2.00506	1.57499	1.58375	1.75235	1.56579	1.53793
2.51395	1.98146	2.31813	2.43892	2.16749	2.43354
1.87813	1.53165	1.83987	1.44973	1.24286	1.18231
1.71129	1.36362	1.18146	1.12335	1.06671	0.943182
1.81219	1.41924	1.22587	1.13222	0.984026	1.03266
2.69664	2.37782	2.22952	2.69847	2.62273	2.78626
1.72707	1.33263	1.18948	1.0259	0.88316	0.842522
1.25783	0.941104	0.748438	0.616215	0.573847	0.559249
5.45236	5.48027	5.522	5.3429	4.30535	5.90743
3.026	2.72807	3.12714	2.99346	2.77699	2.8332
1.78191	1.34573	1.19579	1.03141	0.984881	0.984418
3.00438	2.35372	1.66248	1.52122	1.27046	1.20315
3.90665	3.78697	3.71859	3.99997	3.6343	3.55442
1.81631	1.5482	1.38579	1.09484	0.9678	0.91573
1.45566	1.18291	1.0471	0.911884	0.735107	0.590008
1.69425	1.20681	1.11993	0.987844	0.82487	0.807465
2.0838	1.88806	1.90668	1.63818	1.50224	1.48433
0.894593	0.787414	0.866404	0.803156	0.692411	0.790726
2.23379	2.00108	1.76205	1.33434	1.07562	1.07946
1.59189	1.48796	1.62147	1.54037	1.55697	1.47019
3.66749	3.3999	3.5831	4.11976	3.72704	4.08379
2.5989	2.41261	2.17	2.34918	1.72421	1.9314
1.18713	0.975791	0.880821	0.759024	0.805536	0.622941
1.78164	1.40271	1.3711	1.25533	1.19592	1.05008
2.05809	1.6786	1.56952	1.56774	1.36725	1.31373
1.50598	1.17256	1.02826	0.966455	0.884069	0.89278
1.4019	1.05704	0.968959	0.819661	0.74848	0.753666
3.06664	2.92779	3.44934	2.73354	2.91647	2.53304
1.75651	1.34137	1.33374	1.23643	1.11185	1.05004
2.81293	2.54118	2.63998	2.51942	2.37716	2.27594
0.979839	0.824373	0.743702	0.591712	0.613016	0.459502
2.70695	2.08284	1.69537	1.42134	1.35719	1.27529
1.84452	1.40305	1.14875	1.03057	0.879026	0.954166
2.71248	2.34556	1.8287	1.61664	1.52041	1.46546
2.28277	1.97828	1.59534	1.36726	1.32117	1.27372
2.40571	1.90009	1.52731	1.19702	1.28867	1.02483
1.76464	1.56748	1.32019	1.13784	1.22428	1.09584
3.33838	2.66583	2.19116	1.91818	1.80403	1.43138
2.07097	1.8404	1.38693	1.17957	1.06773	0.912855
1.77247	1.31972	1.0515	0.853288	0.848868	0.813896
1.4969	1.20044	1.14487	0.97428	0.94977	1.02461
1.28568	1.0053	0.859779	0.83321	0.832061	0.764582
1.38625	1.08726	0.875328	0.77581	0.720325	0.714553
2.14377	1.87058	1.77246	1.68326	1.4663	1.33908
3.73732	3.26529	2.97216	2.68501	2.40076	2.33041
1.55687	1.29785	1.15381	0.995097	0.965513	0.984088
4.3732	3.3605	2.61583	2.29943	1.86136	2.09569
1.21122	0.924686	0.899423	0.836198	0.839384	0.814981
0.85467	0.644636	0.450269	0.296181	0.251941	0.222653
1.49686	1.22466	0.996489	0.99095	0.912028	0.811775
3.04901	2.62903	2.67571	2.55136	2.69325	2.48219
3.21052	2.87813	2.54407	1.70521	1.79167	1.62704
2.17367	2.03508	1.6	1.58376	1.46178	1.29826
3.05569	2.37292	2.14108	1.76018	1.71348	1.72825
1.65068	1.29877	0.963285	0.93441	0.87249	0.832348
2.94821	2.67767	2.62142	2.18709	2.21802	2.07217
2.09351	1.68806	1.36996	1.23258	1.04087	1.12727
2.39684	1.98956	1.92514	2.21349	1.74724	1.88361
3.20033	2.74101	2.19108	1.86934	1.84007	1.82485
1.67778	1.24514	1.00525	0.913878	0.879248	0.816508
3.3555	2.51735	2.03755	1.40208	1.24959	1.22964
1.81733	1.49394	1.24345	0.996446	0.810754	0.763584
1.45868	1.27288	1.03118	0.937381	0.9203	0.807134
1.27921	0.877111	0.830353	0.685097	0.585299	0.615133
3.27488	2.56358	2.63625	2.45692	2.52895	2.8523
2.24775	1.91645	1.7404	1.50674	1.26832	1.22249
1.8598	1.48383	1.34014	1.17586	1.1193	1.09153
2.76065	2.58251	2.70512	2.67951	2.34196	2.3671
1.28212	1.08415	0.988801	0.846826	0.813712	0.7677
1.49525	1.26328	1.12654	1.12217	1.26032	1.27232
1.88467	1.82375	1.56718	1.44504	1.51762	1.29545
1.83127	1.61749	1.56214	1.31891	1.20967	1.18742
1.1608	0.836636	0.610989	0.633984	0.520111	0.538507
1.29518	1.0992	0.987367	0.840522	0.74682	0.810627
1.07029	0.936721	0.814491	0.6616	0.630035	0.573134
2.19603	1.83506	1.6477	1.4536	1.33708	1.2011
1.70559	1.37982	1.16018	1.05749	0.980751	0.97081
1.49046	1.09444	0.909906	0.894292	0.777909	0.762561
2.01204	1.66696	1.48982	1.30092	1.23855	1.2266
2.54459	1.7316	1.92709	1.98021	1.56225	1.49226
2.54878	2.17158	1.88432	1.43368	1.30027	1.14967
1.55236	1.4328	1.33482	1.25211	1.20403	1.16524
3.34869	3.07262	2.63711	2.33921	2.25631	2.23416
2.84087	2.35365	2.04026	1.75171	1.72596	1.68936
2.05884	1.44459	1.14072	0.971114	0.841947	0.724932
1.69854	1.30161	1.00633	0.877052	0.769231	0.690261
1.4658	1.21777	1.02892	0.820423	0.854608	0.85511
2.43824	1.99791	1.73764	1.50565	1.57135	1.4124
2.81255	2.05851	1.82752	1.54921	1.43873	1.43056
2.72672	2.76126	2.66073	2.08591	2.03139	1.84096
1.53588	1.25967	1.0594	1.02252	0.964115	0.836037
1.34642	1.0462	0.922431	0.637755	0.575994	0.471341
2.3404	1.78485	1.58762	1.49602	1.44045	1.27145
1.79821	1.51534	1.26981	1.22224	1.18895	1.13318
1.37736	1.13123	0.909567	0.761037	0.680356	0.60906
2.66416	2.51869	2.15755	1.7892	1.75347	1.48892
1.10397	0.887421	0.769404	0.661983	0.614943	0.578491
1.23291	1.07571	0.950999	0.829882	0.831015	0.81494
2.19263	1.61636	1.46051	1.26823	1.02057	1.06497
1.53259	1.1857	0.912043	0.818105	0.801157	0.792948
2.33741	1.77764	1.61016	1.3579	1.27139	1.43476
3.07289	2.70184	2.63752	2.23039	2.33594	2.22089
1.9792	1.56264	1.38076	1.32021	1.29526	1.25876
2.21586	1.57129	1.41034	1.2041	1.05786	1.08025
1.48798	1.15737	0.88952	0.891113	0.81141	0.814887
3.76167	3.42004	3.87382	3.09651	3.20351	3.1652
1.95442	1.68226	1.57097	1.26935	1.10751	1.18205
1.45243	1.16055	0.96757	0.823469	0.737431	0.691872
1.46132	1.24721	1.10279	1.05064	0.898267	0.826521
1.22615	1.01086	0.986087	0.82551	0.769082	0.734705
1.83496	1.35863	1.23299	1.034	0.98971	0.936326
1.95638	1.68463	1.36382	1.20049	1.05195	1.06232
2.21599	1.96334	1.85039	1.64159	1.45286	1.31517
1.62193	1.41902	1.26406	1.0217	1.01126	0.892101
1.641	1.22303	1.02718	0.868278	0.86542	0.773543
1.64163	1.02567	0.918892	0.701794	0.666176	0.666628
1.60409	1.15979	1.07752	1.07221	0.989359	1.05976
1.60851	1.39114	1.25751	0.995598	1.07398	0.904277
3.25021	2.67624	2.70692	2.11891	2.1678	1.97995
2.72296	2.08233	1.72262	1.39086	1.34765	1.3837
1.75062	1.40125	1.25795	1.06999	1.0401	0.924127
1.94806	1.4663	1.25313	1.23941	1.0479	1.00545
1.68433	1.38811	1.24539	1.18568	1.04219	0.910523
2.68194	2.23606	1.92368	1.80668	1.45499	1.2258
2.45258	2.10725	1.79058	1.47303	1.45577	1.23625
3.21118	2.69776	2.50033	2.44212	1.87752	1.9007
3.39715	2.61082	2.18084	1.67392	1.65434	1.53989
2.53084	2.37332	2.09408	2.06644	1.94756	1.87027
2.13838	1.80202	1.48748	1.21891	1.1524	1.13556
2.42147	1.8346	1.46623	1.48149	1.37488	1.34899
2.21219	1.72018	1.33808	1.22707	1.2667	1.2345
