# Supplementary material
Source: ML conference proceedings conference paper supplement (https://openreview.net/forum?id=lDbjooxLkD)
Supplement: supplementary_material [file math_scaling.xlsx]

## Sheet: code
0.03b	0.1b	0.2b	0.5b	0.9b	1.5b	2.4b		1.5b 新
0	0	0	0	0.000625	0.0003125	0.00125		0.000625
0	0	0	0	0	0	0		0
0	0.0003125	0.0009375	0.00875	0.010625	0.009375	0.015625		0.008125
0	0	0.0003125	0.00125	0.000625	0.000625	0.001875		0.000833333
0	0	0	0	0.000625	0.0025	0.00625		0.000625
0	0	0	0	0	0.00015625	0.000208333		0
0	0	0	0	0	0	0		0
0	0	0.000625	0.019375	0.044375	0.07625	0.3925		0.184375
0	0	0	0.000208333	0.0003125	0.006875	0.16375		0.048125
0	0	0	8.92857e-05	0.00125	0.000625	0.0015625		0.000625
0	0	0	0	0	0.000125	0		0
0	0	0	0	0.003125	0.010625	0.01		0.00375
0	0	0	0.004375	0.00375	0.0275	0.085625		0.011875
0	0	0	0.00015625	0.0009375	0.014375	0.03375		0.01125
0	0	0	0	0.000416667	0.000625	0.00125		0.0003125
0	0	0.000125	0	0.000208333	0.003125	0.010625		0.008125
0	0	0	0.000625	0.00375	0.008125	0.0075		0.008125
0	0	0	0	0	0	0		0
0	0	0	0.00015625	0.00125	0.000208333	0.03		0.00125
0	0	0	0	0	0	0		0
0	0	0	0	0	8.92857e-05	0		0
0	0	0	0	0	0.0003125	0.000625		0.000125
0	0.00015625	0.00125	0.010625	0.033125	0.04	0.2175		0.076875
0.0025	0.016875	0.281875	0.38625	0.535625	0.673125	0.695		0.65875
0	0	0	0.000625	0.000625	0.00375	0.004375		0.0025
0	0	0	0	0	0.000208333	0.003125		0.000625
0	0	0	0.000625	0.0175	0.019375	0.073125		0.025
0	0	0	0	0.00015625	0.001875	0.065		0.005625
0.000625	0.013125	0.368125	0.30375	0.38875	0.486875	0.604375		0.556875
0	0	0.003125	0.07	0.290625	0.27	0.755625		0.43125
0	0	0	0.001875	0.039375	0.13	0.2625		0.113125
0	0	0	0.00015625	0.00375	0.065625	0.13375		0.07625
0	0	0	0	0	0	0		0
0	0	0	0	0	0	0		0
0	0.00375	0.01125	0.076875	0.298125	0.174375	0.298125		0.174375
0.000104167	0.000125	0.02125	0.189375	0.294375	0.361875	0.433125		0.389375
0	0	0	0	0	0	0		0
0	0	0	0	0	0	0		0
0	0.000625	0.039375	0.01125	0	0.003125	0		0
0	0	0	0	0	0	0		0
0	0	0	0	0.000208333	0.000208333	0.00015625		0.000208333
0	0.00125	0.001875	0.000625	0.0025	0.009375	0.003125		0.00625
0	0	0.000125	0.019375	0.145	0.24125	0.396875		0.28875
0	0	0	0.000625	0.001875	0.00125	0.005		0.0009375
0	0	0	0	0	8.92857e-05	0.00125		0
0	0	0.000208333	0.0025	0.003125	0.0175	0.081875		0.014375
0	0	0	0	0	0	0.000416667		0
0	0	0	0	0.000625	0.00125	0.0009375		0.0025
0	0	0	0.00125	0.035625	0.058125	0.3		0.05375
0	0	0	0.00125	0.008125	0.033125	0.014375		0.018125
0	0.00125	0.00875	0.014375	0.01	0.001875	0.005625		0.006875
0	0	0	0	0.00375	0.003125	0.02		0.003125
0	0	0.0003125	0.01	0.03	0.05125	0.09125		0.07625
0.000625	0.00125	0.09375	0.31375	0.80625	0.926875	0.930625		0.79
0	0	0	0.0025	0.011875	0.01875	0.02375		0.013125
0	0	0.0003125	0.001875	0.011875	0.094375	0.1625		0.074375
0	0	0	0	0	0	0.000125		0
0	0	0	8.92857e-05	0.000208333	0	0.000416667		0.000625
0	0	0.00015625	0.005	0.05625	0.093125	0.155		0.081875
0	0	0	0	0.000104167	0	0.000104167		0.000625
0	0	0.0003125	0.016875	0.024375	0.11625	0.456875		0.14625
0	0	0	0	0	0	0.000625		0
0	0	0	0.000625	0.00015625	0	0		0.000125
0	0	0	0.00015625	0.00125	0.0025	0.020625		0.005625
0	0	0	0	0	0	0		0
0	0	0	0	0	0.000208333	0.000625		0.000208333
0	0	0	0	0.000208333	0.0025	0.00125		0.000625
0	0	0	0	0	0	0		0
0	0	0	0	0	0	0		0
0	0	0	0	0	0	0		0
0	0	0	0	0	0	0		0
0	0	0	0	0	0	0		0
0	0	0	0	8.92857e-05	0.000104167	0.000208333		0
0	0	0	0	0	0	0.000625		0
0	0	0	0	0	0	0		0.000125
0	0	0	0	0	0	0		0
0	0	0	0.000125	8.92857e-05	0	0.000625		0
0	0	0	0	0	0	0		0
0	0	0	0	0	0	0		0
0	0	0	0	0	0	0		0
0	0	0	0	0	0	0.000208333		0
0	0	0	0	0	0	0		0
0	0	0	0	0.000104167	0.000625	0.000625		0
0	0	0	0	0	0	0		0
0	0	0	0	0	0.0003125	0.000208333		0
0	0	0	0	0	0	0.000104167		0
0	0	0	0	0	0	0		0
0	0	0	0	0	0	0		0
0	0	0	0	0	0	0		0
0	0	0	0	0	0	0		0
0	0	0	0	0.000625	0.000625	0.00125		0
0	0	0	0	0.0003125	0.000625	0.00125		0.000208333
0	0	0	0	0	0	0		0
0	0	0	0	0	0	0		0
0	0	0	0	0	0	0		0
0	0.000125	0.000625	0.000625	0.000625	0.0003125	0		0.000625
0	0	0	0	0	0	0.000625		0
0	0	0	0	0.00015625	0.000625	0.0003125		0.000625
0	0	0	0	0	0	0.0003125		0.000625
0	0	0	0	0	0	0		0
0	0	0	0	0	0	8.92857e-05		0
0	0	0	0	0.001875	0.00375	0.00625		0.00375
0	0	0	0	0.000104167	0.000208333	0.00125		0.0003125
0	0	0	0	0	0	0		0
0	0	0	0	0	0	0		0
0	0	0	0	0	0	0		0
0	0	0	0	0	0	0		0
0	0	0	0	0	0	0		0
0	0	0	0	0	0	0		0
0	0	0	0.000208333	0.001875	0.000625	0.00125		0
0	0	0	0	0.0003125	0	0.000625		0
0	0	0	0	0	0	0		0
0	0	0	0	0	0	0		0
0	0	0	0	0	0	0		0
0	0	0	0	0	0	0		0
0	0	0	0	0	0	0		0
0	0	0	0	0	0	0		0
0	0	0	0	0	0	0		0
0	0	0	0	0	0	0		0
0	0	0	0	0	0	0		0
0	0	0	0.000625	0	0	0.0003125		0.000178571
0	0	0	0	0.000625	0	0.000625		0.000625
0	0	0	0	0	0	0		0
0	0	0	0	0	0	0		0
0	0	0	0	0	0.00015625	0.000208333		0.000125
0	0	0	0	0	0	0		0
0	0	0	0	0	0	0		0
0	0	0	0	0.000104167	0	0.000125		0.000208333
0	0	0	0	0	0	0		0
0	0	0	0	0	0	0		0
0	0	0	0	0	0	0		0
0	0	0	0	0	0	0		0
0	0	0	0	0.0003125	0	0		0
0	0	0	0	0	0	0		0
0	0	0	0	0	0.0003125	0		0
0	0	0	0.000178571	0.000625	0.004375	0.000208333		0.0003125
0	0	0	0	0	0	0		0
0	0	0	0	0	0	0		0
0	0	0	0.001875	0	0.00015625	0.0003125		0.000125
0	0	0	0	0	0.000208333	0.000625		0.000208333
0	0	0	0	0	0	0		0
0	0	0	0	0	0	0		0
0	0	0	0	0	0.000104167	0		0
0	0	0	0	0	0	0		0
0	0	0	0	0	0	0		0
0	0	0	0	0	0	0		0
0	0	0	0	0	0	0		0
0	0	0	0	0	0	0		0
0	0	0	0	0	0	0		0
0	0	0	0	0	0.000208333	0		0
0	0	0	0	0	0	0		0
0	0	0	0	0	0	0		0
0	0	0	0.000125	0.000625	0.00125	0.016875		0.000625
0	0	0	0	0	0	0		0
0	0	0	0.0003125	0.0003125	0.000125	0.000625		0.000208333
0	0	0	0	0	0	0		0
0	0	0	0	0	0	0		0
0	0	0	0.000625	0	0.000625	0.000208333		0.000208333
0	0	0	0	0.00125	0	0		0
0	0	0	0	0	0	0		0
0	0	0	0	0	0	0		0
0	0	0	0	0	0	0		0
0	0	0	0	0.00125	0.009375	0.00125		0.004375
0	0	0	0.0003125	0	0.000125	0		0

## Sheet: 除12000
0.03b	0.1b	0.2b	0.5b	0.9b	1.5b
0	0	0	0	8.92857e-05	0
0	0	0	0	0.000178571	8.92857e-05
0	0.000267857	0.000357143	0.000446429	0.00169643	0.00348214
8.92857e-05	0.000178571	0.000982143	0.00535714	0.00241071	0.00321429
0	0	8.92857e-05	0	0.000357143	0.000178571
0	0	0	0	0	0
0.000178571	0	0.000625	0.000446429	0.00205357	0.00267857
0.00758929	0.00803571	0.0130357	0.0116964	0.0159821	0.0199107
0	0	0	0.000625	0.000178571	0.000803571
0.000535714	0.000803571	0.000714286	0.00160714	0.00196429	0.00428571
0.000178571	0.000357143	0.00160714	0.00232143	0.00258929	0.00410714
0	0	0	0	0	0
0.000267857	0.000535714	0.000892857	0.00366071	0.00732143	0.00616071
0.00544643	0.00794643	0.01125	0.0150893	0.0159821	0.0170536
0	0	8.92857e-05	0.000178571	0.000178571	0.000625
0	0	8.92857e-05	0.000357143	0.00151786	0.00125
0.00330357	0.00357143	0.00392857	0.0107143	0.00696429	0.0116071
0.000446429	0.000982143	0.00107143	0.00133929	0.00375	0.00678571
0.000535714	0.001875	0.001875	0.00428571	0.00214286	0.00205357
0	8.92857e-05	0	0.000535714	0.000178571	0.000535714
0	0	0	0	0	0.000357143
0	0	0	8.92857e-05	8.92857e-05	8.92857e-05
0	8.92857e-05	8.92857e-05	0	8.92857e-05	0.000267857
0.000267857	0.000625	0.000357143	0.001875	0.00321429	0.003125
0.000178571	8.92857e-05	0.000535714	0.000535714	0.00107143	0.000892857
0.000178571	0.000267857	0.000357143	0.000625	0.000357143	0.000982143
8.92857e-05	0.000178571	8.92857e-05	0.000803571	0.000446429	0.000803571
8.92857e-05	0	0.000267857	0.000535714	0.000714286	0.000714286
0.00232143	0.00348214	0.0025	0.00589286	0.00508929	0.00866071
0.00473214	0.00598214	0.008125	0.005	0.00821429	0.0117857
0	0	0	0	0	0
0	0.000267857	0.000982143	0.00107143	0.00107143	0.00169643
0.00160714	0.00133929	0.00330357	0.00258929	0.0103571	0.00767857
0	0	8.92857e-05	0.000357143	0.000178571	0.000714286
0	8.92857e-05	0.000714286	0.000178571	0.000982143	0.00133929
0	0	0	0	8.92857e-05	8.92857e-05
0.000178571	0.000625	0.00258929	0.00517857	0.00348214	0.00267857
0.000535714	0.000982143	0.00142857	0.00178571	0.00669643	0.00705357
8.92857e-05	8.92857e-05	0.000535714	0.000892857	0.000178571	0.000535714
0.000535714	0.000625	0.00107143	0.00196429	0.003125	0.00401786
0	0	0	0	0	0
8.92857e-05	0.00107143	0.00116071	0.00151786	0.00294643	0.00142857
0	0	0	0	0	8.92857e-05
0	0	0	0	0	0
0.000178571	0.000446429	0.000625	0.000446429	0.000625	0.000535714
0.00294643	0.00517857	0.00642857	0.00616071	0.0025	0.00330357
8.92857e-05	0	8.92857e-05	0.000357143	0.000178571	0.000625
0	0	0	0	0	0
0	0	0	8.92857e-05	0	0
0.000178571	8.92857e-05	8.92857e-05	0.000714286	0.00241071	0.00392857
0.000535714	0.000357143	0.00464286	0.00258929	0.00410714	0.00419643
0.00276786	0.00964286	0.0100893	0.0170536	0.0132143	0.0140179
0	8.92857e-05	0	0	8.92857e-05	0.000267857
0	0	0	8.92857e-05	8.92857e-05	0
0.00339286	0.0410714	0.0890179	0.107232	0.135179	0.0698214
0	0.000714286	0.000267857	0.00205357	0.00223214	0.00544643
0	0	0	8.92857e-05	0.000178571	0.000357143
0	0	0	0.00160714	0.00160714	0.00241071
8.92857e-05	0.000446429	0.000625	0.00133929	0.000714286	0.00214286
0.000178571	0.00125	0.00321429	0.00267857	0.00553571	0.00446429
8.92857e-05	8.92857e-05	0.000267857	0.000446429	0.000625	0.000535714
0	0	0	0	0	0
0.00116071	0.0113393	0.00651786	0.014375	0.0346429	0.0210714
0	8.92857e-05	8.92857e-05	0.000357143	0.000982143	0.00151786
0.000178571	0	0	0.000178571	0	0.000357143
0	0	0	0	0.000267857	0.000357143
0.000357143	0.000178571	0.0025	0.00366071	0.00491071	0.01125
0.001875	0.00330357	0.00607143	0.0119643	0.0107143	0.014375
0.00116071	0.00205357	0.00482143	0.00535714	0.00642857	0.00616071
0.00107143	0.00330357	0.00428571	0.00839286	0.0133929	0.0153571
0.00303571	0.00241071	0.00375	0.00571429	0.00464286	0.00616071
0	0	0	0	0	0
0.00535714	0.0125	0.0121429	0.0174107	0.016875	0.0189286
0.000267857	0.000892857	0.00205357	0.00196429	0.00214286	0.00696429
0.000982143	0.000803571	0.00125	0.00294643	0.00767857	0.0100893
0	0	0	8.92857e-05	0	0.000178571
0	0	0	0	0	0
0.001875	0.00508929	0.0129464	0.00910714	0.0138393	0.0200893
0.000267857	0.000357143	0.00205357	0.000535714	0.00267857	0.00214286
0.00142857	0.0025	0.00294643	0.00616071	0.006875	0.00598214
0.00660714	0.0217857	0.0275	0.0291964	0.0371429	0.0390179
8.92857e-05	0.000267857	0.000178571	0.000625	0.000178571	0.000535714
0.00107143	0.000892857	0.00232143	0.0127679	0.0229464	0.0304464
0	0	0	0	0	0
8.92857e-05	0.000267857	0.000357143	0.000892857	0.00107143	0.00232143
0	0	0	8.92857e-05	0.000625	0.00116071
0.000625	0.00205357	0.00366071	0.00339286	0.00482143	0.00553571
0	0	0	0	0	8.92857e-05
0.00401786	0.00589286	0.0108929	0.0201786	0.0138393	0.031875
0.000357143	0.000535714	0.000803571	0.00366071	0.00375	0.0075
0.000178571	0.000178571	0.00107143	0.00535714	0.00571429	0.00258929
0.000625	0.001875	0.00205357	0.00946429	0.0157143	0.0075
0.000803571	0.00214286	0.00285714	0.00392857	0.00651786	0.005
8.92857e-05	0.000178571	0.000267857	0.00133929	0.0025	0.00419643
0.00205357	0.00241071	0.00178571	0.00232143	0.00294643	0.00339286
0	0	0	0	0	0.000446429
0.00133929	0.00366071	0.00455357	0.00410714	0.00357143	0.00455357
0.00276786	0.000803571	0.00321429	0.00410714	0.00455357	0.00598214
0	0	0	0	0.000178571	0.000178571
0.00160714	0.00133929	0.00276786	0.0130357	0.0109821	0.0155357
0	0.000535714	0.000267857	0.00116071	0.00151786	0.00330357
0.00303571	0.00455357	0.00964286	0.0170536	0.0535714	0.0241964
0.000178571	0.000625	0.00107143	0.00205357	0.00294643	0.00401786
0.000178571	0.000267857	0.000535714	0.00223214	0.00294643	0.00571429
0.000535714	0.000357143	0.000446429	0.00116071	0.000535714	0.00223214
0	8.92857e-05	0.000178571	0.000535714	0.000892857	0.00107143
0	0	0.000178571	0.000535714	8.92857e-05	0.000178571
0	0	0	8.92857e-05	0.000178571	0.00178571
0	0	0	0	0	8.92857e-05
0.00241071	0.00214286	0.00464286	0.00348214	0.00473214	0.00669643
0	8.92857e-05	0.000446429	8.92857e-05	0.000446429	0.000892857
0	0.000178571	0.000535714	0.000892857	0.00473214	0.00553571
0.000625	0.000446429	0.000446429	0.00928571	0.00758929	0.0136607
0.00258929	0.003125	0.00535714	0.0157143	0.0127679	0.0184821
0.00321429	0.00758929	0.0189286	0.03375	0.0365179	0.0274107
0.000267857	0.000357143	0.000982143	0.000803571	0.00232143	0.0075
0	0	0	0	0.000357143	8.92857e-05
0.000357143	0.000535714	0.00160714	0.000803571	0.00232143	0.00241071
0.005625	0.0119643	0.0135714	0.0365179	0.0371429	0.0227679
0.000446429	0.00125	0.00267857	0.00151786	0.00241071	0.00392857
0.00276786	0.00723214	0.0217857	0.0320536	0.0275893	0.0372321
0.000178571	8.92857e-05	8.92857e-05	0.00214286	0.000803571	0.00303571
0	0	0	0	0	0.000178571
0.00178571	0.00553571	0.00875	0.0138393	0.0166071	0.0282143
0	0	0	0	0	0.000267857
0.000535714	0.000267857	0.000357143	0.000357143	0.00107143	0.00133929
0	0	0	8.92857e-05	0	0.000178571
0	0.000178571	0.000178571	0.000267857	0.00125	0.000892857
0	8.92857e-05	0	0.000178571	8.92857e-05	0.000178571
0	0	0.000267857	0.000267857	0.000178571	0.000803571
0.000178571	0.000178571	0.000982143	0.000625	0.000446429	0.000535714
0.00625	0.00928571	0.011875	0.029375	0.0253571	0.026875
0.000267857	0.000178571	0.00294643	0.0159821	0.0141071	0.0108036
8.92857e-05	0	0	0	8.92857e-05	0.000625
0.000178571	0.000267857	0.000357143	0.00116071	0.000535714	0.00142857
0.000178571	0	0.000357143	0.000267857	0.00116071	0.00223214
0.000625	0.0025	0.00357143	0.00633929	0.0108036	0.0121429
0.00178571	0.00294643	0.00669643	0.0108929	0.0140179	0.015
0	8.92857e-05	0.000625	0.00133929	0.00151786	0.00258929
0.00455357	0.00410714	0.00785714	0.0174107	0.011875	0.0175
0.000357143	0.000625	0.00294643	0.00142857	0.00241071	0.00151786
0	0	0	0	0	0
0.000982143	0.000982143	0.00267857	0.00517857	0.00696429	0.00714286
0	0.000178571	0.000446429	8.92857e-05	0	0.000446429
0	0	0	0	0	8.92857e-05
0	0	0	0	0	0
0.000267857	0.000625	0.000535714	0.00205357	0.00321429	0.00491071
0	0	0	0	0	0
0	0	0	0	0	0
0.0108929	0.0325893	0.0363393	0.0674107	0.0499107	0.0864286
0	0	0	0	8.92857e-05	8.92857e-05
0	0	0	0	8.92857e-05	0.000178571
0	0	0	0	8.92857e-05	8.92857e-05
0	8.92857e-05	0	0.000803571	0.00125	0.00383929
0.000625	0.00196429	0.00196429	0.00142857	0.000803571	0.00723214
8.92857e-05	0	8.92857e-05	0.000267857	0.000178571	0.000982143
0.001875	0.00383929	0.00642857	0.00910714	0.00919643	0.0228571
0.00160714	0.00196429	0.00196429	0.00267857	0.00366071	0.00651786
0.00258929	0.00598214	0.0152679	0.0172321	0.0216071	0.0215179
0	0	0	0	8.92857e-05	0.000625
0	0	0	0	8.92857e-05	0.000178571
0	0	0	0.000267857	0	0.000803571
8.92857e-05	8.92857e-05	0	0.000625	0.000535714	0.000803571
0.000178571	0.000178571	0.000178571	0.000535714	0.000357143	0.000892857
0.00669643	0.00455357	0.0105357	0.0117857	0.0108929	0.0172321
8.92857e-05	0.000982143	0.00196429	0.00553571	0.00633929	0.0115179
0	0	0	0	0	0
0.000267857	0.000267857	0.000803571	0.00142857	0.00133929	0.00142857
0.000267857	0.000267857	0.000267857	0.000803571	0.00232143	0.00116071
0.00178571	0.00241071	0.00330357	0.00741071	0.00526786	0.00464286
0	8.92857e-05	0	0.000178571	8.92857e-05	8.92857e-05
0	0	0	0	0	0
0	0.000178571	0.000446429	0.000803571	0.000982143	0.00133929
0.00571429	0.0104464	0.0129464	0.0124107	0.00955357	0.014375
8.92857e-05	0.000982143	0.00267857	0.00651786	0.00348214	0.00723214
0.00401786	0.0149107	0.0225	0.0380357	0.0557143	0.0276786
0.000178571	0.00196429	0.00660714	0.0201786	0.0248214	0.0169643
8.92857e-05	0	0	8.92857e-05	0	8.92857e-05
0.000178571	0	8.92857e-05	0.000446429	0.000625	0.00133929
0.000535714	0.00196429	0.00223214	0.00267857	0.008125	0.00625
0.00196429	0.00866071	0.015	0.0209821	0.0290179	0.0295536
0	0.000267857	0.000446429	0.000178571	0.000446429	0.000714286
0.000267857	8.92857e-05	0.000446429	0.000357143	0.000446429	0.000892857
0	0	8.92857e-05	0	0.000267857	0.000357143
0.000803571	0.00151786	0.000982143	0.00241071	0.00821429	0.00544643
0.003125	0.008125	0.0226786	0.0346429	0.0415179	0.0328571
0.00142857	0.00330357	0.00830357	0.0124107	0.0203571	0.0209821
8.92857e-05	8.92857e-05	0.000982143	0.00116071	0.00508929	0.0025
0	0	0	0	0	0
0	0	0	0	0	8.92857e-05
0	0	0	0.000446429	0.00142857	0.00321429
0.000267857	0.000178571	0.000892857	0.000357143	0.000803571	0.00357143
0.00410714	0.00357143	0.004375	0.00669643	0.00589286	0.00732143
0	8.92857e-05	0.000535714	0.001875	0.00178571	0.00133929
0.00223214	0.0025	0.00276786	0.006875	0.00910714	0.0175893
0.00205357	0.0124107	0.0164286	0.0157143	0.0224107	0.0375893
0	0	0	0	0.000267857	0.000267857
8.92857e-05	0.000803571	0.00232143	0.00125	0.000625	0.00348214
8.92857e-05	8.92857e-05	0	0.000267857	8.92857e-05	0.000357143
0.001875	0.00651786	0.00883929	0.0299107	0.0221429	0.0396429
0.000889732	0.00196161	0.00324196	0.00524196	0.00623929	0.00680491
